# Supplementary material for: Direct letters to relatives at risk of hereditary cancer—study protocol for a multi-center randomized controlled trial of healthcare-assisted versus family-mediated risk disclosure at Swedish cancer genetics clinics (DIRECT-study)
Source: Springer Nature journal article supplement (doi:10.1186/s13063-023-07829-5), 2023-12-17
Supplement: MOESM2 [file 26537488]

**N.B.** The form is to be submitted to the study office after completed patient appointment.

# CRF 1 - Research subject data

Study site  Göteborg  Linköping  Lund  Stockholm  Umeå  Uppsala  \_\_\_\_\_

| A. Personal data    |                                                                                                                                                                                                                                   |                                                                                                                                         |
|---------------------|-----------------------------------------------------------------------------------------------------------------------------------------------------------------------------------------------------------------------------------|-----------------------------------------------------------------------------------------------------------------------------------------|
| Family number       | Local identification number:                                                                                                                                                                                                      | Cancer diagnosis or relapse in the last year<br>Yes <input type="radio"/><br>No <input type="radio"/>                                   |
| Name                | First name/ Last name _____                                                                                                                                                                                                       |                                                                                                                                         |
| Social security no. | YYYYMMDD-XXXX <input type="text"/> <input type="text"/> <input type="text"/> <input type="text"/> <input type="text"/> <input type="text"/> - <input type="text"/> <input type="text"/> <input type="text"/> <input type="text"/> | Patient prefers<br>Paper survey (record address) <input type="radio"/><br>E-survey online (record e-mail-address) <input type="radio"/> |
| Contact info.       | Address / e-mail                                                                                                                                                                                                                  |                                                                                                                                         |

| B. Consent |                                                                                                                               |
|------------|-------------------------------------------------------------------------------------------------------------------------------|
| Date       | <input type="text"/> <input type="text"/> <input type="text"/> <input type="text"/> <input type="text"/> <input type="text"/> |

| C. Inclusion criteria                           |                                                    |
|-------------------------------------------------|----------------------------------------------------|
| a) Referred to or contacted oncogenetic unit    | Yes <input type="radio"/> No <input type="radio"/> |
| b) Returned signed consent form                 | Yes <input type="radio"/> No <input type="radio"/> |
| c) Is over 18 years of age                      | Yes <input type="radio"/> No <input type="radio"/> |
| d) Belongs to family with increased risk (to D) | Yes <input type="radio"/> No <input type="radio"/> |
| e) Has at least one at-risk relative to inform  | Yes <input type="radio"/> No <input type="radio"/> |

| D. Family diagnosis                               |                           |
|---------------------------------------------------|---------------------------|
| 1. Familial breast cancer (risk >20%)             | Yes <input type="radio"/> |
| 2. Familial colorectal cancer (>1 coloskopy)      | Yes <input type="radio"/> |
| 3. Pathogenic variant in BRCA1, BRCA2, PALB2      | Yes <input type="radio"/> |
| 4. Lynch syndrome (MLH1, MSH2, MSH6, PMS2, EPCAM) | Yes <input type="radio"/> |

| E. Randomization (if patient fulfills all criteria in C)               |                                             |                                                                                                                                                               |
|------------------------------------------------------------------------|---------------------------------------------|---------------------------------------------------------------------------------------------------------------------------------------------------------------|
| <input type="radio"/> New patient                                      | <input type="radio"/> Previously randomized | DIRECT-participant number:<br><input type="text"/> <input type="text"/> <input type="text"/> <input type="text"/> - <input type="text"/> <input type="text"/> |
| <input type="checkbox"/> Control <input type="checkbox"/> Intervention |                                             |                                                                                                                                                               |

Genetic screening  Predictive testing

| F. Cancer genetic results discussed with patient                                                                                                            |                                          |                                                                                                                                                                |
|-------------------------------------------------------------------------------------------------------------------------------------------------------------|------------------------------------------|----------------------------------------------------------------------------------------------------------------------------------------------------------------|
| Clinical relevance for at-risk relatives discussed with patient. (T=0).<br><br><b>Note:</b> Also fill in the CRF2-form with listing of p at-risk relatives. | Staff in charge of appointment:<br>_____ | Date (T=0)<br><input type="text"/> <input type="text"/> <input type="text"/> <input type="text"/> <input type="text"/> <input type="text"/><br>Date (YY/MM/DD) |
|                                                                                                                                                             | Comment / note:<br>_____                 |                                                                                                                                                                |

| G. Transfer to research database (for study staff in Umeå)                                                                                                         |              |                                                                                                                                                                                           |
|--------------------------------------------------------------------------------------------------------------------------------------------------------------------|--------------|-------------------------------------------------------------------------------------------------------------------------------------------------------------------------------------------|
| Date of registration (YYYY/MM/DD)<br><input type="text"/> <input type="text"/> <input type="text"/> <input type="text"/> <input type="text"/> <input type="text"/> | Other notes: | Adress to the study office:<br><b>Norrlands universitetssjukhus<br/>Regionalt cancercentrum Norr<br/>Cancerogenetisk mottagning<br/>"DIRECT-studien" / Carin Nylander<br/>901 85 UMEÅ</b> |
| Signature                                                                                                                                                          |              |                                                                                                                                                                                           |

**Questions?** Please contact the national study coordinator by phone **076-69 60 648** or by email **directstudien.rct@umu.se**.

**N.B.** The form should be stored together with patient records in local clinical archive.

# CRF 2 - Family follow-up data

## A. Patient under investigation

|                              |                                                                                                                                                                                                                                     |                                                                                                      |
|------------------------------|-------------------------------------------------------------------------------------------------------------------------------------------------------------------------------------------------------------------------------------|------------------------------------------------------------------------------------------------------|
| Family number                | Local identification number:                                                                                                                                                                                                        | Assigned to study group<br><input type="checkbox"/> Control<br><input type="checkbox"/> Intervention |
| Study-specific family number | DIRECT-study participant number: <input type="text"/> <input type="text"/> <input type="text"/> <input type="text"/> - <input type="text"/> <input type="text"/>                                                                    |                                                                                                      |
| Name                         | First / Last name _____                                                                                                                                                                                                             | Signature:                                                                                           |
| Social security no.          | YYYY/MM/DD-XXXX <input type="text"/> <input type="text"/> <input type="text"/> <input type="text"/> <input type="text"/> <input type="text"/> - <input type="text"/> <input type="text"/> <input type="text"/> <input type="text"/> |                                                                                                      |

Total number of at-risk relatives

|          |                                           |                        |                                           |       |                                           |
|----------|-------------------------------------------|------------------------|-------------------------------------------|-------|-------------------------------------------|
| Sex      | <input type="text"/> <input type="text"/> | Women                  | <input type="text"/> <input type="text"/> | Men   | <input type="text"/> <input type="text"/> |
| Relation | <input type="text"/> <input type="text"/> | 1 <sup>st</sup> degree | <input type="text"/> <input type="text"/> | Other | <input type="text"/> <input type="text"/> |

## B. At-risk relatives (complete the list for all study participants)

|          |                                                                                                                                                                           |                                                                     |                                                                                       |
|----------|---------------------------------------------------------------------------------------------------------------------------------------------------------------------------|---------------------------------------------------------------------|---------------------------------------------------------------------------------------|
| <b>1</b> | <input type="radio"/> Sister <input type="radio"/> Brother <input type="radio"/> Mother <input type="radio"/> Father <input type="radio"/> _____                          | Is the at-risk relative already aware of the genetic investigation? | Yes <input type="radio"/><br>No <input type="radio"/><br>Unsure <input type="radio"/> |
|          | First- & Last name _____                                                                                                                                                  | Has contacted oncogenetic clinic?<br>Date <input type="text"/>      | Yes <input type="radio"/><br>No <input type="radio"/>                                 |
|          | Street Address _____                                                                                                                                                      | Address details sufficient to send DIRECT-letter?                   | Yes <input type="radio"/><br>No <input type="radio"/>                                 |
|          | Zip code <input type="text"/> <input type="text"/> <input type="text"/> <input type="text"/> <input type="text"/> <input type="text"/> City _____                         | Proband consented to contact the at-risk relative by letter?        | Yes <input type="radio"/><br>No <input type="radio"/>                                 |
|          | Date of birth (if known) + additional notes <input type="text"/> <input type="text"/> <input type="text"/> <input type="text"/> <input type="text"/> <input type="text"/> | DIRECT-letter sent to relative<br>Date <input type="text"/>         | Yes <input type="radio"/><br>No <input type="radio"/>                                 |
|          |                                                                                                                                                                           | Letter retrieved from postal office<br>Date <input type="text"/>    | Yes <input type="radio"/><br>No <input type="radio"/>                                 |

|          |                                                                                                                                                                           |                                                                     |                                                                                       |
|----------|---------------------------------------------------------------------------------------------------------------------------------------------------------------------------|---------------------------------------------------------------------|---------------------------------------------------------------------------------------|
| <b>2</b> | <input type="radio"/> Sister <input type="radio"/> Brother <input type="radio"/> Mother <input type="radio"/> Father <input type="radio"/> _____                          | Is the at-risk relative already aware of the genetic investigation? | Yes <input type="radio"/><br>No <input type="radio"/><br>Unsure <input type="radio"/> |
|          | First- & Last name _____                                                                                                                                                  | Has contacted oncogenetic clinic?<br>Date <input type="text"/>      | Yes <input type="radio"/><br>No <input type="radio"/>                                 |
|          | Street Address _____                                                                                                                                                      | Address details sufficient to send DIRECT-letter?                   | Yes <input type="radio"/><br>No <input type="radio"/>                                 |
|          | Zip code <input type="text"/> <input type="text"/> <input type="text"/> <input type="text"/> <input type="text"/> <input type="text"/> City _____                         | Proband consented to contact the at-risk relative by letter?        | Yes <input type="radio"/><br>No <input type="radio"/>                                 |
|          | Date of birth (if known) + additional notes <input type="text"/> <input type="text"/> <input type="text"/> <input type="text"/> <input type="text"/> <input type="text"/> | DIRECT-letter sent to relative<br>Date <input type="text"/>         | Yes <input type="radio"/><br>No <input type="radio"/>                                 |
|          |                                                                                                                                                                           | Letter retrieved from postal office<br>Date <input type="text"/>    | Yes <input type="radio"/><br>No <input type="radio"/>                                 |

>>> Additional listing space on the next page

|                                                                                                                                                                                                                     |                                                                                                                                                  |                                                                     |                                                                                       |
|---------------------------------------------------------------------------------------------------------------------------------------------------------------------------------------------------------------------|--------------------------------------------------------------------------------------------------------------------------------------------------|---------------------------------------------------------------------|---------------------------------------------------------------------------------------|
| <b>3</b>                                                                                                                                                                                                            | <input type="radio"/> Sister <input type="radio"/> Brother <input type="radio"/> Mother <input type="radio"/> Father <input type="radio"/> _____ | Is the at-risk relative already aware of the genetic investigation? | Yes <input type="radio"/><br>No <input type="radio"/><br>Unsure <input type="radio"/> |
|                                                                                                                                                                                                                     | First- & Last name _____                                                                                                                         | Has contacted oncogenetic clinic?<br>Date _____                     | Yes <input type="radio"/><br>No <input type="radio"/>                                 |
| Street Address _____                                                                                                                                                                                                |                                                                                                                                                  | Address details sufficient to send DIRECT-letter?                   | Yes <input type="radio"/><br>No <input type="radio"/>                                 |
| Zip code <input type="text"/> <input type="text"/> <input type="text"/> <input type="text"/> <input type="text"/> <input type="text"/> City _____                                                                   |                                                                                                                                                  | Proband consented to contact the at-risk relative by letter?        | Yes <input type="radio"/><br>No <input type="radio"/>                                 |
| Date of birth (if known) + additional notes <input type="text"/> |                                                                                                                                                  | DIRECT-letter sent to relative<br>Date _____                        | Yes <input type="radio"/><br>No <input type="radio"/>                                 |
|                                                                                                                                                                                                                     |                                                                                                                                                  | Letter retrieved from postal office<br>Date _____                   | Yes <input type="radio"/><br>No <input type="radio"/>                                 |

|                                                                                                                                                                                                                     |                                                                                                                                                  |                                                                     |                                                                                       |
|---------------------------------------------------------------------------------------------------------------------------------------------------------------------------------------------------------------------|--------------------------------------------------------------------------------------------------------------------------------------------------|---------------------------------------------------------------------|---------------------------------------------------------------------------------------|
| <b>4</b>                                                                                                                                                                                                            | <input type="radio"/> Sister <input type="radio"/> Brother <input type="radio"/> Mother <input type="radio"/> Father <input type="radio"/> _____ | Is the at-risk relative already aware of the genetic investigation? | Yes <input type="radio"/><br>No <input type="radio"/><br>Unsure <input type="radio"/> |
|                                                                                                                                                                                                                     | First- & Last name _____                                                                                                                         | Has contacted oncogenetic clinic?<br>Date _____                     | Yes <input type="radio"/><br>No <input type="radio"/>                                 |
| Street Address _____                                                                                                                                                                                                |                                                                                                                                                  | Address details sufficient to send DIRECT-letter?                   | Yes <input type="radio"/><br>No <input type="radio"/>                                 |
| Zip code <input type="text"/> <input type="text"/> <input type="text"/> <input type="text"/> <input type="text"/> <input type="text"/> City _____                                                                   |                                                                                                                                                  | Proband consented to contact the at-risk relative by letter?        | Yes <input type="radio"/><br>No <input type="radio"/>                                 |
| Date of birth (if known) + additional notes <input type="text"/> |                                                                                                                                                  | DIRECT-letter sent to relative<br>Date _____                        | Yes <input type="radio"/><br>No <input type="radio"/>                                 |
|                                                                                                                                                                                                                     |                                                                                                                                                  | Letter retrieved from postal office<br>Date _____                   | Yes <input type="radio"/><br>No <input type="radio"/>                                 |

|                                                                                                                                                                                                                     |                                                                                                                                                  |                                                                     |                                                                                       |
|---------------------------------------------------------------------------------------------------------------------------------------------------------------------------------------------------------------------|--------------------------------------------------------------------------------------------------------------------------------------------------|---------------------------------------------------------------------|---------------------------------------------------------------------------------------|
| <b>5</b>                                                                                                                                                                                                            | <input type="radio"/> Sister <input type="radio"/> Brother <input type="radio"/> Mother <input type="radio"/> Father <input type="radio"/> _____ | Is the at-risk relative already aware of the genetic investigation? | Yes <input type="radio"/><br>No <input type="radio"/><br>Unsure <input type="radio"/> |
|                                                                                                                                                                                                                     | First- & Last name _____                                                                                                                         | Has contacted oncogenetic clinic?<br>Date _____                     | Yes <input type="radio"/><br>No <input type="radio"/>                                 |
| Street Address _____                                                                                                                                                                                                |                                                                                                                                                  | Address details sufficient to send DIRECT-letter?                   | Yes <input type="radio"/><br>No <input type="radio"/>                                 |
| Zip code <input type="text"/> <input type="text"/> <input type="text"/> <input type="text"/> <input type="text"/> <input type="text"/> City _____                                                                   |                                                                                                                                                  | Proband consented to contact the at-risk relative by letter?        | Yes <input type="radio"/><br>No <input type="radio"/>                                 |
| Date of birth (if known) + additional notes <input type="text"/> |                                                                                                                                                  | DIRECT-letter sent to relative<br>Date _____                        | Yes <input type="radio"/><br>No <input type="radio"/>                                 |
|                                                                                                                                                                                                                     |                                                                                                                                                  | Letter retrieved from postal office<br>Date _____                   | Yes <input type="radio"/><br>No <input type="radio"/>                                 |

|                                   |
|-----------------------------------|
| Comment to the study secretariat: |
| <br><br><br>                      |

# CRF 3 - Outcome data

Study site  Göteborg  Linköping  Lund  Stockholm  Umeå  Uppsala  \_\_\_\_\_

| A. Patient who started the investigation |                                                                                                                                                                                                                                          |                                                                               |
|------------------------------------------|------------------------------------------------------------------------------------------------------------------------------------------------------------------------------------------------------------------------------------------|-------------------------------------------------------------------------------|
| Family number                            | Local unit/clinic number: _____                                                                                                                                                                                                          | Assigned to study group                                                       |
| Study-specific family number             | DIRECT-study participant number: <input type="text"/> <input type="text"/> <input type="text"/> <input type="text"/> - <input type="text"/> <input type="text"/>                                                                         | <input type="checkbox"/> Control<br><input type="checkbox"/> Intervention     |
| Name                                     | First / Last Name _____                                                                                                                                                                                                                  | Type of investigation                                                         |
| Social security no.                      | Date YYYY/MM/DD-XXXX <input type="text"/> <input type="text"/> <input type="text"/> <input type="text"/> <input type="text"/> <input type="text"/> - <input type="text"/> <input type="text"/> <input type="text"/> <input type="text"/> | <input type="checkbox"/> Gen.screen.<br><input type="checkbox"/> Pred.testing |

| B. Evaluation of results                                                                                                      |                           |
|-------------------------------------------------------------------------------------------------------------------------------|---------------------------|
| Date when registers were checked                                                                                              | (First / Last name) _____ |
| Relatives were followed-up (YYYY/MM/DD)                                                                                       | Comments /notes:          |
| <input type="text"/> <input type="text"/> <input type="text"/> <input type="text"/> <input type="text"/> <input type="text"/> |                           |

| C. Summary of main outcome after 12 months                                          | TOTAL                                     |                                                                                                                                                                                                                                                                                                                                                                                                                                                                                       |             |                                                                                     |                                |                                                                                     |
|-------------------------------------------------------------------------------------|-------------------------------------------|---------------------------------------------------------------------------------------------------------------------------------------------------------------------------------------------------------------------------------------------------------------------------------------------------------------------------------------------------------------------------------------------------------------------------------------------------------------------------------------|-------------|-------------------------------------------------------------------------------------|--------------------------------|-------------------------------------------------------------------------------------|
| I: Total number of relatives who could benefit from being informed                  | <input type="text"/> <input type="text"/> | <table border="1" style="width: 100%; border-collapse: collapse;"> <tr><td style="text-align: center;">Women / Men</td></tr> <tr><td style="text-align: center;"><input type="text"/> <input type="text"/> <input type="text"/> <input type="text"/></td></tr> <tr><td style="text-align: center;">1<sup>st</sup> degree / Other</td></tr> <tr><td style="text-align: center;"><input type="text"/> <input type="text"/> <input type="text"/> <input type="text"/></td></tr> </table> | Women / Men | <input type="text"/> <input type="text"/> <input type="text"/> <input type="text"/> | 1 <sup>st</sup> degree / Other | <input type="text"/> <input type="text"/> <input type="text"/> <input type="text"/> |
| Women / Men                                                                         |                                           |                                                                                                                                                                                                                                                                                                                                                                                                                                                                                       |             |                                                                                     |                                |                                                                                     |
| <input type="text"/> <input type="text"/> <input type="text"/> <input type="text"/> |                                           |                                                                                                                                                                                                                                                                                                                                                                                                                                                                                       |             |                                                                                     |                                |                                                                                     |
| 1 <sup>st</sup> degree / Other                                                      |                                           |                                                                                                                                                                                                                                                                                                                                                                                                                                                                                       |             |                                                                                     |                                |                                                                                     |
| <input type="text"/> <input type="text"/> <input type="text"/> <input type="text"/> |                                           |                                                                                                                                                                                                                                                                                                                                                                                                                                                                                       |             |                                                                                     |                                |                                                                                     |
| II: Number of relatives who could not be identified / address unknown               | <input type="text"/> <input type="text"/> |                                                                                                                                                                                                                                                                                                                                                                                                                                                                                       |             |                                                                                     |                                |                                                                                     |
| III: Number of relatives who contacted a cancer genetics clinic within 1 year       | <input type="text"/> <input type="text"/> | <table border="1" style="width: 100%; border-collapse: collapse;"> <tr><td style="text-align: center;">Women / Men</td></tr> <tr><td style="text-align: center;"><input type="text"/> <input type="text"/> <input type="text"/> <input type="text"/></td></tr> <tr><td style="text-align: center;">1<sup>st</sup> degree / Other</td></tr> <tr><td style="text-align: center;"><input type="text"/> <input type="text"/> <input type="text"/> <input type="text"/></td></tr> </table> | Women / Men | <input type="text"/> <input type="text"/> <input type="text"/> <input type="text"/> | 1 <sup>st</sup> degree / Other | <input type="text"/> <input type="text"/> <input type="text"/> <input type="text"/> |
| Women / Men                                                                         |                                           |                                                                                                                                                                                                                                                                                                                                                                                                                                                                                       |             |                                                                                     |                                |                                                                                     |
| <input type="text"/> <input type="text"/> <input type="text"/> <input type="text"/> |                                           |                                                                                                                                                                                                                                                                                                                                                                                                                                                                                       |             |                                                                                     |                                |                                                                                     |
| 1 <sup>st</sup> degree / Other                                                      |                                           |                                                                                                                                                                                                                                                                                                                                                                                                                                                                                       |             |                                                                                     |                                |                                                                                     |
| <input type="text"/> <input type="text"/> <input type="text"/> <input type="text"/> |                                           |                                                                                                                                                                                                                                                                                                                                                                                                                                                                                       |             |                                                                                     |                                |                                                                                     |

| D. Intervention - secondary outcomes                                       |                                           |
|----------------------------------------------------------------------------|-------------------------------------------|
| I: Relatives the proband consented to contact by DIRECT-letter (number)    | <input type="text"/> <input type="text"/> |
| II: Relatives who had already contacted a clinic before letter (number)    | <input type="text"/> <input type="text"/> |
| III: Number of registered letters which were actually sent                 | <input type="text"/> <input type="text"/> |
| IX: Number of registered letters which were retrieved from the post office | <input type="text"/> <input type="text"/> |

| G. Transfer to research databas                                                                                                             |                                          |                                                                                                                                                                                                                                                                            |
|---------------------------------------------------------------------------------------------------------------------------------------------|------------------------------------------|----------------------------------------------------------------------------------------------------------------------------------------------------------------------------------------------------------------------------------------------------------------------------|
| Day of registration (YYYY/MM/DD)                                                                                                            | Comments /notes for study administrator: | <p><b>Norrlands universitetssjukhus</b><br/>                     Regionalt cancercentrum norr<br/>                     Att. Carin Nylander<br/>                     "DIRECT-studien"<br/>                     Byggnad 5B, plan 0,<br/>                     901 85 UMEÅ</p> |
| <input type="text"/> <input type="text"/> <input type="text"/> <input type="text"/> <input type="text"/> <input type="text"/><br>Signature: |                                          |                                                                                                                                                                                                                                                                            |

**Questions?** Please contact the national study coordinator by phone **076-69 60 648** or by email **directstudien.rct@umu.se**.
