# Supplementary material for: Direct letters to relatives at risk of hereditary cancer—study protocol for a multi-center randomized controlled trial of healthcare-assisted versus family-mediated risk disclosure at Swedish cancer genetics clinics (DIRECT-study)
Source: Springer Nature journal article supplement (doi:10.1186/s13063-023-07829-5), 2023-12-17
Supplement: MOESM3 [file 26537488]

Table S1. Progress criteria and study site audit measures

|                                  | <b>Question</b>                                                                                                   | <b>Pilot outcome</b>                                                                                                  | <b>Progression criteria</b>                                                                   |
|----------------------------------|-------------------------------------------------------------------------------------------------------------------|-----------------------------------------------------------------------------------------------------------------------|-----------------------------------------------------------------------------------------------|
| Clinical uncertainties           | Is the direct letter an accepted mode of contact with relatives by participants?                                  | Proportion of previously unnotified relatives that the participant accepts to be contacted by letter                  | Go: 40-100%<br>Amend: 20-40%<br>Alert: <20%                                                   |
|                                  | Is the psychological reaction to listing details of relatives acceptable during the counselling session?          | Any report of severe adverse effects from the listing of relatives among the 20 individuals in the internal pilot.    | Go: No reports<br>Amend: 1-2 reports<br>Alert: >2 reports                                     |
|                                  | How will at-risk relatives react when they pick up a direct letter with information about hereditary cancer risk? | Any report of severe adverse effects from at-risk relatives as response to receiving letter.                          | Go: No reports<br>Amend: 1-2 reports<br>Alert: >2 reports                                     |
| Procedural uncertainties         | How many eligible patients are invited to join the trial per study site and time?                                 | Number of invited patients per center and month.                                                                      | Go: >1 patient.<br>Amend: 0-1 patient.<br>(If 0 included the study site may be discontinued.) |
|                                  | How many eligible patients were invited to join the trial per each study site's recruitment basis?                | Number of invited patients during one month / number of clinical admissions of eligible patients the same month.      | Go: >40%<br>Amend: 10-40%<br>Alert: <10%                                                      |
|                                  | Inclusion: How many patients did NOT accept invitation to participate in the study?                               | Number of patients who decline or do not return their consent form within 4 weeks / number of patients invited.       | Go: <30%<br>Amend: 30-50%<br>Alert: >50%                                                      |
| Procedural uncertainties (cont.) | How many patients return their Consent Forms to the clinics?                                                      | Number of Consent forms returned at IPP (internal pilot point) per invited patients 4 weeks before IPP and studysite. | Go: >40%<br>Amend: 10-40%<br>Alert: <10%                                                      |

|                              |                                                                                                                          |                                                                                         |                                                               |
|------------------------------|--------------------------------------------------------------------------------------------------------------------------|-----------------------------------------------------------------------------------------|---------------------------------------------------------------|
|                              | Is the added time required to administer intervention acceptable in the clinical setting?                                | Estimated working time per at-risk relative by research nurses and/or trial physicians. | Go: <1 hours<br>Amend: 1min-3h<br>Alert: >3h                  |
|                              | Is it possible to retrieve the data for the final outcome from local patient registries within an acceptable time?       | Reported estimated time to fill in the CRF3 per participant.                            | Go: <2 hour<br>Amend: 2-6 hour<br>Alert: >6 hours             |
| Methodological uncertainties | Does the HCP treat control and intervention group according to study protocol.                                           | Observational data from patient visits reporting deviation from protocol.               | Go: No reports<br>Amend: 0-1 reports<br>Alert: >1 reports     |
|                              | How will the participants in the control arm react when they are NOT offered the service of direct letters to relatives? | Drop-out rates when finding out one has been randomized to the control arm.             | Go: 0 drop-outs<br>Amend: 1-2 drop-out<br>Alert: >2 drop-outs |
